# 1 **Distribution and density of oxpeckers on giraffes in**

## 2 **Hwange National Park, Zimbabwe**

**Roxanne Gagnon<sup>1</sup>, Cheryl T. Mabika<sup>2</sup>, and Christophe Bonenfant<sup>3,4</sup>**

<sup>1</sup>Université de Sherbrooke, Département de biologie, 2500 Boulevard de l'Université, Sherbrooke, Québec J1K 2R1, Canada.

<sup>2</sup>Zimbabwe Parks and Wildlife Management Authority, Hwange Cluster, Main Camp, Zimbabwe.

<sup>3</sup>Université Claude Bernard – Lyon 1; UMR CNRS 5558, Laboratoire de Biométrie et Biologie Évolutive, F-69 622, Villeurbanne CEDEX, France.

ORCID: 0000-0002-9924-419X

<sup>4</sup>LTSER France, Zone Atelier "Hwange", Hwange National Park, Bag 62, Dete, Zimbabwe – CNRS HERD (Hwange Environmental Research Development) program

#### 4 **Correspondence**

5 C. Bonenfant

6 Email: [christophe.bonenfant@univ-lyon1.fr](mailto:christophe.bonenfant@univ-lyon1.fr)

**Abstract** Oxpeckers (*Buphagus sp.*) are two bird species closely associated to large mammals, including giraffes (*Giraffa camelopardalis*). Here, we counted every oxpeckers on giraffe's body from pictures to infer on the foraging behaviour of birds. We tested whether oxpeckers distributed themselves at random or aggregated on individual giraffes. We then quantified the distribution of oxpeckers over predefined zones on the giraffe body, to test the prediction that birds would preferentially be located on the host's body parts with the greatest amount of ticks. Oxpeckers displayed a strong aggregation behaviour with few hosts carrying many birds while many carried a limited number or no birds, a pattern that differed between sexes. Oxpeckers were disproportionately found on the mane and back, where the density of ticks is presumably the highest. This high aggregation level of birds is typical of parasitic species and therefore suggests that, in some cases, oxpeckers behave more as parasites rather than a mutualistic species. Alternatively this particular oxpecker distribution may mirror the distribution of ticks on giraffes. Abundance of ticks appears as a major driver of the oxpecker foraging behaviour, and the oxpecker–large herbivores system proves to be highly relevant for the study of host–parasite dynamics.

## 1 | INTRODUCTION

2 The distribution of animals in the environment results from a complex sequence of  
3 behavioural decisions aiming at satisfying the energy requirements of individuals while  
4 minimizing costs of movements, competition with con-specifics or other species, in balance  
5 with the perceived risks of predation for prey species (Krebs, 1972). From an evolutionary  
6 perspective, animals should select habitats with the highest suitability (sensu Fretwell &  
7 Lucas, 1969), *i.e.* those habitats in which the fitness of individuals will be the greatest.  
8 Variation in habitat suitability, in space and time, is of prime importance to the ecology of  
9 species with consequences on its distribution range (MacArthur, 1972), its mating tactic  
10 (Emlen & Oring, 1977), or its population dynamics (Lack, 1966; Ostfeld & Keesing, 2000).

11 At the population level, when and where resources are available is a strong predictor of  
12 the abundance of animals. Assuming an homogeneous distribution of discrete resources  
13 patches in the landscape and a random walk of foraging animal trajectories, the expected  
14 number of foragers per patch is given by a Poisson distribution (Hutchinson & Waser,  
15 2007). This simple model of encounters between motile entities underpins most  
16 multi-species interaction models, including the Lotka-Volterra (Lotka, 1956; Hutchinson &  
17 Waser, 2007) or Nicholson-Bailey models (May, 1978) for, respectively, predators–prey and  
18 hosts–parasitoid dynamics. Any deviation from the Poisson distribution is usually  
19 interpreted as a sign of aggregation (over-dispersion) or avoidance (under-dispersion) of  
20 individuals (Pielou (1969, p. 96) but see Taylor et al. (1979) or Sjöberg et al. (2000) for a  
21 discussion and alternatives). Several indices have been proposed to quantify aggregation  
22 levels among populations or species from count data (see Kretzschmar and Adler 1993 for  
23 a review), the most widely used being the aggregation index  $k$  (Shaw et al., 1998).  
24 Aggregation may arise from the animal behaviour such as social interactions (Wittenberger,  
25 1981), constrain on mobility among patches (Gueron & Levin, 1995), or if animals perform  
26 area-restricted search of food patches (Morales et al., 2010) or do copy what the other  
27 con-specifics do when using public information (Clark & Mangel, 1986).

28 In multi-species interactions such as in bird vs. large mammals associations, the

1 distribution of the birds is first guided by the one of the mammalian hosts, conceptually  
2 equivalent to a resource patch. This scenario fits the association between oxpeckers  
3 (*Buphagus sp.*) and large herbivores, described in the early 20th century (Moreau, 1933).  
4 Oxpeckers are two bird species of sub-Saharan Africa associated to savanna ecosystems  
5 (Hustler, 1987; Plantan, 2009; Palmer & Packer, 2018). They live and feed almost  
6 exclusively on the body of large herbivores such as African buffaloes (*Syncerus caffer*  
7 *caffer*), giraffes (*Giraffa camelopardalis*), black rhinoceros (*Diceros bicornis*), white  
8 rhinoceros (*Ceratotherium simum*), impalas (*Aepyceros melampus*), greater kudu  
9 (*Tragelaphus strepsiceros*), common elands (*Taurotragus oryx*) and sable antelopes  
10 (*Hippotragus niger*) (Hustler, 1987; Stutterheim et al., 1988; Palmer & Packer, 2018).  
11 Oxpeckers mainly prey upon ectoparasites of their large mammalian hosts although they  
12 sometimes can snatch tissues from their host (Bezuidenhout & Stutterheim, 1980). In  
13 terms of resource selection, the foraging behavior of oxpeckers can be decomposed into  
14 two main steps. The first step for birds is to localize large mammals in the landscape which,  
15 for oxpeckers represent motile and widely dispersed resources patches of varying size. The  
16 second event takes place on the host's body where oxpeckers will search for the most  
17 suitable body part in terms of ectoparasites. These two sequential steps, taking place at  
18 different spatio-temporal scales (see Johnson, 1980), will drive the distribution of oxpeckers  
19 among hosts and on their body.

20 At the largest spatial scale, the distribution of oxpeckers among the different species of  
21 mammalian hosts has been documented for decades (Moreau, 1933; Grobler, 1980;  
22 Hustler, 1987; Ndlovu & Combrink, 2015). Clear preferences were demonstrated and, with  
23 a large body and a high tolerance to the presence of birds, the giraffe appears to be one of  
24 the key host for two oxpecker species (Grobler, 1980; Veríssimo et al., 2017). Much less is  
25 known about how oxpeckers are distributed on the different individuals of a given host  
26 species, with the exception of maximum records (e.g. 51 birds on one side of a single  
27 giraffe, Veríssimo et al. (2017)). At the host level of resource selection, oxpeckers seems to  
28 favor some body parts of their hosts but what body parts is most attractive seems to be  
29 different according to the host species (Palmer & Packer, 2018). For instance, Ndlovu &

1 Combrink (2015) reported that red-billed oxpeckers (*Buphagus erythrorhynchus*) were most  
2 frequently perch on the back and the head of buffaloes and white rhinoceros and that the  
3 neck was preferred on giraffes.

4 In this paper we investigated the among-host and within-host distribution of oxpeckers  
5 on giraffes at Hwange National Park, Zimbabwe. We extracted the number and location of  
6 yellow-billed (*Buphagus africanus*) and red-billed oxpeckers on  $n = 683$  giraffes from 500  
7 pictures collected since 2013. We aimed at testing the random encounter model between  
8 foragers and hosts, and the ideal free distribution (IFD, Fretwell & Lucas, 1969) with  
9 oxpeckers as foragers and giraffes as their primary large mammalian hosts. We tested the  
10 three following predictions:

11 1. *Distribution of oxpeckers among giraffes*: By comparing the observed distribution of  
12 the number of oxpeckers per giraffe with the expected prediction from theoretical  
13 models, one may infer the underlying behaviour of resource selection by birds and  
14 their movements. If oxpeckers search for giraffes at random in the landscape the  
15 random encounter model predicts a Poisson distribution of birds among hosts  
16 (Hutchinson & Waser, 2007). Alternatively, if oxpeckers aggregate preferentially on  
17 some particular giraffes because of marked differences in the parasite load or  
18 because of copying behaviour, the model predicts a negative binomial distribution of  
19 birds among hosts (Pielou, 1969);

20 2. *Distribution of oxpeckers on giraffe body*: According to the IFD (Fretwell & Lucas,  
21 1969), oxpeckers should be distributed on the giraffe body parts proportionally to the  
22 local ectoparasite load. Therefore, if the ectoparasite density is homogeneous over  
23 the whole giraffe body, the IFD predicts a homogeneous number of oxpeckers per  
24 area unit. Alternatively, if ectoparasites concentrate on some specific body parts, the  
25 IFD predicts a heterogeneous distribution of birds, with higher densities of oxpeckers  
26 on giraffe body parts with the higher ectoparasite burden (Horak et al., 1983;  
27 Mysterud et al., 2014). From previous observations (Plantan, 2009; Ndlovu &  
28 Combrink, 2015), giraffe body parts with the highest oxpecker number should be, in

1 decreasing order, the mane, the neck, the scapula and the back;

2 3. *Sex-differences in bird load of giraffes*: Many studies evidenced that the ectoparasite  
3 load is proportional to the body mass and skin surface of the host (Horak et al., 1983,  
4 1987; Koenig, 1997). Consequently a bigger host should carry more ectoparasites  
5 and hence, more birds than a smaller one. Sexual size dimorphism is observed  
6 among many species and is particularly observable between male and female  
7 giraffes, reaching a 43% difference for fully grown individuals (Shorrocks, 2016). We  
8 will therefore test the prediction that more birds are present on male than on female  
9 giraffes;

## 10 **2 | MATERIAL AND METHODS**

### 11 **2.1 | Study site**

12 This study was undertaken around Main Camp in the northeast of Hwange National Park ,  
13 the main biological reserve of Zimbabwe (HNP; 19°00'S, 26°30'E, extending from Main  
14 Camp to Giraffe's spring and Ngweshla pans; Fig. 1). This park covers 14 650 km<sup>2</sup> and  
15 supports a population of approx. 2 800 giraffes (Shorrocks, 2016). The Bulawayo-Victoria  
16 Falls railway line defines the western boundary of HNP while border with Botswana draws  
17 the eastern boundary. The long-term mean annual rainfall is ca. 600 mm (CV = 25%) and  
18 generally falls between October and April to form seasonal wetlands. Because of this  
19 relatively low annual rainfall, a xerophile vegetation covers most of HNP. The woodland  
20 vegetation consists primarily of African teak (*Baikiaea plurijuga*) intersected with patches of  
21 camel thorn (*Acacia erioloba*) or leadwood (*Combretum imberbe*). Bushland savanna with  
22 patches of grassland makes 64% of the area, mainly around the many artificially  
23 maintained waterholes. HNP hosts many large and mega-herbivore species attractive to  
24 oxpeckers, including giraffes, plain zebras (*Equus quagga*), African buffaloes, wildbeest  
25 (*Connochaetes taurinus*), greater kudu, waterbuck (*Kobus ellipsiprymnus*) and impala,  
26 and the less abundant sable and roan antelopes (*H. equinus*).

## 1 **2.2 | Oxpecker biology**

2 Red-billed oxpecker (RBO) and yellow-billed oxpecker (YBO) are two sympatric species,  
3 strictly african, that can be mostly found in Botswana, Namibia, South Africa and Zimbabwe  
4 (Hustler, 1987; Plantan, 2009; Palmer & Packer, 2018). Although those birds feed mainly  
5 on ticks, many studies have reported that oxpeckers can feed on wounded tissue, mucus,  
6 saliva, ear wax, hair and blood (Bezuidenhout & Stutterheim, 1980; Weeks, 1999; Plantan,  
7 2009). Some authors definitely think that the interaction between oxpeckers and mammalian  
8 hosts is parasitism, while others support mutualism even though they admit oxpeckers can  
9 cause injuries to hosts (van Someren, 1951; Samish & Rehacek, 1999). In fact the  
10 relationship between oxpeckers and hosts could be context-dependent, where birds can be  
11 opportunists under particular biotic and abiotic conditions (Moreau, 1933; Nunn et al.,  
12 2011; Plantan, 2009). For instance, a mutualistic relationship may develop when the  
13 ectoparasite load is high on the host, but oxpeckers may become parasitic when hosts  
14 carry few ticks with too many birds, and leads to numerous open wounds.

## 15 **2.3 | Data collection**

16 Oxpecker data derived from the study of giraffe ecology carried out at HNP. We have been  
17 monitoring the giraffe population opportunistically in 2012 and 2013, and on a regular basis  
18 since 2014, aiming at the photo-identification of individuals. Each year we drove the HNP  
19 road network daily (Fig. 1) for at least three weeks in a row and shot pictures of every  
20 encountered giraffes. For all encounters, we recorded the date, the location and the time of  
21 observation along with group size and composition the individuals belonged to. We sexed  
22 giraffes based on the presence of bare skin at the ossicone tip for males, and on shape of  
23 the skull or visible male genitals when possible. We classified giraffes into four age-classes  
24 (calf, juvenile, sub-adult and adult) assessed in the field from their size and coat color since  
25 giraffes darken with age (Dagg, 2014). In this study we used pictures taken between 2013  
26 and 2015, yielding a total of 500 photographs and a sample size of 683 giraffes. Although  
27 we avoided to analyze a sequence of continuous pictures, re-observations of the same

1 individual in time might have occurred, either during the same field session or from one  
2 year to another. Doing so, we assumed very little consequences of pseudo-replication on  
3 the results because of the rapid exchanges and movements of oxpeckers among hosts. We  
4 then counted oxpeckers on every giraffes seen on pictures and assigned each detected  
5 bird to one of the 14 predefined parts of the giraffe body (see Fig. 3A). Giraffe body parts  
6 were chosen so that they could easily be identified from landmark points whatever the point  
7 of view. We excluded approx. 50% of all pictures because giraffes were too small to reliably  
8 spot oxpeckers which roughly corresponded to a giraffe relative size smaller than  $1/3$  of the  
9 picture height, or because of a poor picture quality. For a subset of pictures we repeated  
10 oxpecker counts twice with two different observers (RG and CB) to estimate bird detection  
11 probability.

## 12 **2.4 | Data analyses**

13 We first estimated the detection probability of individual oxpeckers from pictures by setting  
14 a double-observer experiment (Nichols et al., 2000). The two observers reported the total  
15 number of detected birds they found (noted  $x_{11}$  and  $x_{22}$ ) from which we calculated the  
16 number of birds seen by observer 1 and missed by 2 ( $x_{12}$ ) and conversely ( $x_{21}$ ). The  
17 double-observer method returns the detection probability of observer 1 and 2 (respectively  
18  $p_1$  and  $p_2$ ), as well as the average detection probability of birds  $p$ . The estimated number of  
19 oxpeckers per giraffe is then given by  $\hat{N} = (x_{11} + x_{22} + x_{12} + x_{21})/\hat{p}$ . We fit the  
20 double-observer model to our data with the *unmarked* library (Fiske & Chandler, 2011) and  
21 tested for the effect of host sex on the detection probabilities.

22 We derived the aggregation index  $k$  from a particular parameterization of the negative  
23 binomial distribution (where the variance  $V$  is related to the mean by  $V = \lambda + \lambda^2/k$ ) that  
24 takes values close to zero with increasing levels of aggregation. To compare with previous  
25 studies, we also estimated the preference of oxpeckers for given hosts with a preference  
26 index (PI), calculated as the number of hosts counted divided by the number of oxpeckers  
27 counted. A PI of 5 means one bird is seen every fifth counted hosts on average. We  
28 computed confidence limits of point estimates of PI with a non-parametric bootstrap.



1 We estimated the relative distribution of oxpeckers on giraffe body parts with a  
2 multinomial logistic regression. This particular type of GLM estimates the 14 probabilities  
3 (noted  $\pi_j$ ) of birds to be located on each body part of the giraffe holding the constrain that  
4  $\sum_{j=1}^{14} \pi_j = 1$ . To control for the imbalanced number of males and female giraffes among  
5 years, we entered year as a categorical variable before testing for the effect the host sex (a  
6 2-levels categorical variable) on the relative density of oxpeckers on body parts with  
7 likelihood ratio tests using the *nnet* library (Venables & Ripley, 2002).

8 Finally, we modeled the number of oxpeckers per giraffe with generalized linear models  
9 (GLMs), testing for effect of host sex (a 2-levels categorical variable), accounting for the  
10 effects of time (year as a categorical variable), with likelihood ratio tests using the *MASS*  
11 library (Venables & Ripley, 2002). We ran all analyses in the **R** 3.4 statistical software (R  
12 Core Team, 2018). Unless otherwise stated, we reported all estimated parameters as  
13 mean  $\pm$  sd and predicted probabilities as the mean with its associated 95% confidence  
14 interval in brackets.

### 15 **3 | RESULTS**

16 From a subsample of  $n = 117$  giraffes, the overall detection probability of oxpeckers was  
17  $\hat{p} = 0.99$  (0.97, 1.00) but differed substantially between the two observers (RG:  
18  $\hat{p}_1 = 0.97$  (0.95, 0.98); CB:  $\hat{p}_2 = 0.85$  (0.81, 0.89)). Although oxperckers have 1.3 more  
19 chances to be seen on a male than on female giraffe, detection probability did not differ  
20 significantly between the host sex (estimated difference between male and female hosts on  
21 the logit scale:  $\beta = 0.26 \pm 0.34$ ,  $P = 0.45$ ). On average we estimated oxpecker density to be  
22  $D_O = 2.91$  (2.63, 3.23) birds per giraffe once we accounted for imperfect detections. In the  
23 following analyses, RG did analyze all pictures.

24 When using  $n = 683$  giraffes, mean oxpecker density was  $2.16 \pm 3.01$  birds per host  
25 without accounting for detection probability. The overall preference index (PI) is  $0.46 \pm 0.10$   
26 with a maximum number of oxpeckers counted on a single host of 17 (Fig. 2). In support of  
27 the aggregation hypothesis, the estimated aggregation coefficient  $\hat{k} = 0.68$  (0.58, 0.79)  
28 suggested a strong aggregation of oxpeckers on individual giraffes. Because the estimated

1 aggregation coefficient  $k$  approaches zero, the negative binomial distribution converges to  
2 the logarithmic series distribution, with a strong skew toward giraffe carrying no bird  
3 (Fig. 2). Overall, our results lend support to the hypothesis of a non-random association  
4 between oxpeckers and giraffes at HNP ( $H_1$ ).

5 The relative distribution of oxpeckers on giraffe's body deviated strongly from uniformity  
6 with some body parts being much more used than others (Fig. 3B). Supporting our  
7 hypothesis  $H_2$ , birds gathered principally on the neck ( $\pi = 0.18$  (0.15, 0.20)) and mane  
8 ( $\pi = 0.25$  (0.21, 0.27)) of giraffes, but were rarely seen on the lower limbs ( $\pi < 0.01$ ) or on  
9 the tail ( $\pi < 0.01$ ). Oxpeckers did not use the giraffe's body differently according to the host  
10 sex (likelihood ratio test:  $\chi^2 = 28.68$ ,  $df = 13$ ,  $P = 0.07$ ; Fig. 3B), although relatively more  
11 birds used the ano-genital ( $\beta = 0.40 \pm 0.56$ ,  $P = 0.47$ ) and the scapula areas  
12 ( $\beta = 0.45 \pm 0.53$ ,  $P = 0.39$ ) of females compared to males. Conversely more birds were  
13 seen on the head ( $\beta = 1.53 \pm 0.57$ ,  $P < 0.001$ ) and rump ( $\beta = 1.17 \pm 0.54$ ,  $P = 0.03$ ) of  
14 male giraffes. Our results hence confirm the marked heterogeneous distribution of  
15 oxpeckers on the body of large mammalian hosts.

16 Although GLM with a Poisson distribution and a logarithmic link are usually  
17 recommended for count data (Agresti 2002), a preliminary goodness-of-fit (GOF) test  
18 suggested an over-dispersion of the data compared to a Poisson distribution ( $\chi^2 = 2877.21$ ,  
19  $df = 682$ ,  $P < 0.001$ ). A GLM with negative binomial distribution did fit the data better  
20 than with a Poisson distribution (GOF test:  $\chi^2 = 609.10$ ,  $df = 682$ ,  $P = 0.98$ ). As expected  
21 from our last hypothesis  $H_3$ , the number of oxpeckers was larger on the giraffes exposing  
22 the largest body area to the birds (Fig 4). Accordingly, we found that oxpeckers were 20%  
23 more numerous on males than on females (density of  $2.60 \pm 0.25$  and  $2.07 \pm 0.14$  birds per  
24 giraffe respectively:  $\beta = 0.23 \pm 0.12$ ,  $\chi^2 = 3.75$ ,  $df = 1$ ,  $P = 0.05$ ). The sex-specific  
25 aggregation coefficient reads  $k = 0.85 \pm 0.09$  and  $k = 0.62 \pm 0.07$  for females and males  
26 respectively, and was significantly smaller for male giraffes (bootstrap test:  $\beta = 0.23 \pm 0.13$ ,  
27  $P = 0.02$ ).

## 1 4 | DISCUSSION

2 The foraging behaviour and type of interaction between oxpeckers and their large  
3 mammalian hosts is poorly understood and still debated (Weeks, 2000; Nunn et al., 2011;  
4 Welsh et al., 2019). A closer look at the distribution of birds among and within giraffes at  
5 HNP clearly shows how heterogeneous it is at the host level with many carrying no bird  
6 while a few has  $> 10$  birds on them. We also provide empirical evidences for non-random  
7 choice of host body part by oxpeckers, a behaviour likely driven by the amount of ticks birds  
8 can find and share with conspecifics. Overall the observed oxpecker distribution among  
9 giraffes at HNP matches with distributions generally observed in parasitic organisms,  
10 although we reckon it may only mirror the tick load of individual hosts.

11 The distribution of oxpeckers on giraffes results, sequentially from the choice of an  
12 individual giraffe in the landscape followed by the choice of a body part of this host, to prey  
13 ultimately upon ectoparasites. At the largest spatio-temporal scale, oxpeckers have to  
14 chose among large herbivore species, which is reflected by the host's preference index  
15 (PI). The observed  $PI = 0.46 \pm 0.10$  for giraffes at HNP is similar to previously reported  
16 values in Kruger National Park (KNP), South Africa (0.90 for Grobler (1980); 0.54 for  
17 Ndlovu & Combrink (2015); 0.51 for Welsh et al. (2019) in Kenya). Surprisingly, Hustler  
18 (1987) found PI of 5.39 and 6.71 for giraffes in two separate areas of HNP. Host availability  
19 should indeed influence oxpeckers' choice because the decrease in abundance of a key  
20 host such as the giraffe may force birds to switch to another less preferred but more  
21 numerous host with little fitness costs (Pyke, 1984; Hustler, 1987; Welsh et al., 2019).  
22 Here, host size plays a major role in host detection in flight and giraffes – like other large  
23 mammalian hosts – are easier to detect compared with smaller species (Grobler, 1980;  
24 Koenig, 1997). This is the main reason why the key host of oxpeckers alternates between  
25 buffaloes (Hustler, 1987), white rhinoceros (Ndlovu & Combrink, 2015) and giraffes  
26 (Grobler, 1980; Ndlovu & Combrink, 2015). The past high PI of giraffes at HNP suggests  
27 that birds must have exploited others hosts in the 80ies such as black rhinoceros, white  
28 rhinoceros, roans and sables (see Hustler, 1987, for details). This interpretation is

1 supported by change in the composition of HNP's community of large herbivores over the  
2 last decades with, notably, the recent loss of the white rhinoceros (Valeix et al., 2008),  
3 which is consistent with the low PI values we report here for giraffes.

4 Focusing on the choice of individual giraffes by oxpeckers, we found a marked  
5 asymmetric distribution of birds (exponential distribution) whereby many carried no bird and  
6 a few ones were seen with up to 17 birds simultaneously (Fig. 2). This non-random  
7 distribution of oxpeckers among individual giraffes usually likely results from an aggregation  
8 behaviours (Palmer & Packer, 2018). The aggregation coefficient  $k$  we found for the  
9 oxpecker distribution at HNP, close to 0, is typical of parasitic infections where only a few  
10 individuals are massively infested (Shaw et al., 1998). That oxpeckers similarly aggregate  
11 on a few giraffes would suggest they behave like parasites with their host in agreement with  
12 previous studies (Plantan, 2009; Nunn et al., 2011). Birds could use public information like  
13 conspecific density to chose a giraffe in a group (Doligez et al., 2004). Because oxpeckers  
14 mostly feed on ectoparasites, the marked aggregation of birds could indirectly mirror the  
15 distribution of ticks among giraffes. In mammals, infestation is indeed highly variable  
16 among hosts (*e.g.* Shaw et al., 1998; Brunner & Ostfeld, 2008). For instance, in roe deer  
17 (*Capreolus capreolus*), bank vole (*Clethrionomys glareolus*) and mountain hare (*Lepus*  
18 *timidus*), most host individuals bear few ticks and only a few individuals bear many (Horak  
19 et al., 1983; Talleklint & Jaenson, 1997; Mysterud et al., 2014). From this hypothesis, one  
20 could make indirect inference on tick burden of individual giraffes from the number of  
21 hosted oxpeckers, given the birds distribute themselves according to the ideal free  
22 distribution.

23 Within giraffes, we clearly found preferences for some body parts by oxpeckers. At HNP,  
24 oxpeckers were mostly found on the neck and the back of giraffes followed by the head, the  
25 abdomen, the lower limbs and the tail (see also Plantan, 2009; Ndlovu & Combrink, 2015,  
26 for similar results). The mane seems the most preferred giraffes' body part of oxpeckers  
27 (Koenig, 1997). This row of hairs seems to be a favourable habitat for ectoparasites by  
28 providing shelter from predators (Ndlovu & Combrink, 2015) although oxpeckers use a  
29 scissoring behaviour to easily pick parasites from the hairs Koenig (1997). It has been

1 noted that oxpeckers gather at the bigger host's mane to hide from predators or when they  
2 are alarmed, which may contribute to increase their number in this area. However, because  
3 giraffes rarely feed directly on the ground (Seeber et al., 2012) we expected a relatively low  
4 density of ticks on the giraffe's head. Our results support this assertion but oxpeckers could  
5 sometimes forage the head seeking for other food resources such as saliva, mucus, earwax  
6 (Ndlovu & Combrink, 2015) or wounds. This also could be the case for female genitalia  
7 where oxpeckers can also feed on mucus and secretion of their hosts (Weeks, 1999;  
8 Plantan, 2009). The abdomen, groins, thighs and tail present the lowest density of  
9 oxpeckers. Unlike mane, these areas are parts that can be easily groomed by giraffes,  
10 depleting tick quickly and making this area less preferred for oxpeckers (Koenig, 1997;  
11 Ndlovu & Combrink, 2015). Assuming that abundance or presence of ticks is highest in the  
12 mane running on the neck and back of giraffes, our results would concur with the  
13 distribution of oxpeckers as predicted by the optimal foraging theory (Pyke, 1984).

14 Density of oxpeckers differed substantially according to the sex of the giraffe, with male  
15 hosts carrying 20% more birds than females (Fig. 4). This higher abundance of oxpeckers  
16 on male than on female giraffes likely proceed from their higher load in ectoparasites and  
17 hence, larger food resources for the birds. The simplest explanation is that male giraffes  
18 being larger than females, more birds can feed on a male holding a constant *per capita*  
19 food rate. Alternative explanations may also account for the preference of male hosts by  
20 oxpeckers, ranging from male-specific parasitic load, to the aggressive behaviour. Previous  
21 studies who investigated the effect of host sex on the ectoparasite load are equivocal in  
22 mammals. For instance, Horak et al. (1987) reported more ticks (*Amblyomma hebraeum*)  
23 on male kudus, which could make the female less attractive to oxpeckers.

24 Conversely, another study carried out in Scandinavia found that tick load was similar  
25 whatever the sex and age of red deer (*Cervus elaphus*) (Mysterud et al., 2014). A  
26 proximate mechanism for why male giraffes would carry more ticks than females is  
27 intra-sexual fights for reproduction. Neck fight, opponent chasing and female mounting  
28 indeed result in males having many injuries and open wounds all over their body (Nunn  
29 et al., 2011). Being opportunistic feeders, oxpeckers benefit from the higher wound- and

1 tick-feeding opportunities on male giraffes (Plantan, 2009). Alternatively, the handicap  
2 principle of the sexual selection (Zahavi, 1975) proposes that, by surviving with many  
3 parasites or extravagant sexually selected traits, males would display honestly their intrinsic  
4 quality to females. Hence, oxpeckers could play the role of indirect signal of ectoparasite  
5 load of male giraffes.

6 To evaluate the reliability of the oxpecker detection and location on giraffes from  
7 pictures, we carried out a double-observer experiment on a sub-sample of our images. We  
8 found the overall detection of the birds from photos to be very high (99%) but ideally all  
9 should be analyzed by 2 observers. Although not perfect, one person only (RG) scrutinized  
10 the 500 photographs henceforth keeping the detection and condition of observation similar  
11 for the complete data set. A major advantage of oxpecker counts from pictures is to make  
12 the counts and analyses repeatable and, contrary to what one might think, the use of one  
13 side of giraffes to locate and to count birds is an advantage because it avoids the issue of  
14 double counting. That said, we acknowledge that the major bias of our study was the  
15 location where the giraffe pictures were taken *i.e.* mainly around the many artificially  
16 maintained waterholes where large herbivores come to drink. When a large herbivore stand  
17 on the shore of waterholes, oxpeckers often use it as platform to rest, to sunbath, and to  
18 reach water to drink as well (Stutterheim, 1976). Consequently, the maximum number of  
19 oxpeckers per giraffe may be higher than elsewhere in HNP. To avoid this bias some  
20 studies tend to limit counting within 500 meters of water points (Grobler, 1980) but because  
21 HNP is densely covered with trees, observations of giraffes away from waterholes remained  
22 very difficult.

## 23 **5 | CONCLUSION**

24 Our study puts forward that the distribution and abundance of oxpeckers were surprisingly  
25 heterogeneous among and within giraffes. Some host body parts are clearly preferred for  
26 foraging by birds such as the neck and the mane because those areas could be suitable  
27 habitats for ticks. Gregarious hosts (female giraffes, buffaloes) travel and forage as a group  
28 thereby increasing local abundance and transmission of ticks (Koenig, 1997) to which

1 oxpeckers could be excellent control agents on wild large herbivores and on domestic ones  
2 too (Ndlovu & Combrink, 2015). From an ecological point of view, the oxpecker–large  
3 herbivores system proves to be highly relevant and useful for the study of host-parasite  
4 dynamics.

## 5 **Acknowledgements**

6 We would like to thank Simon Chamailé-James and Marion Valeix for their critical reading  
7 of the manuscript. Thanks are extended to Martin Muzamba and Trust Dube for their  
8 invaluable help in data collection at Hwange, and to the park authorities of Zimbabwe for  
9 their support.

## 10 **References**

- 11 Bezuidenhout, J. D., & Stutterheim, C. (1980). A critical evaluation of the role played by the  
12 red-billed oxpecker *Buphagus erythrorhynchus* in the biological control of ticks. *The*  
13 *Onderstepoort Journal of Veterinary Research*, *47*, 51–75.
- 14 Brunner, J. L., & Ostfeld, R. S. (2008). Multiple causes of variable tick burdens on small-mammal  
15 hosts. *Ecology*, *89*, 2259–2272.
- 16 Clark, C. W., & Mangel, M. (1986). The evolutionary advantages of group foraging. *Theoretical*  
17 *population biology*, *30*, 45–75.
- 18 Dagg, A. I. (2014). *Giraffe: biology, behaviour and conservation*. Cambridge University Press.
- 19 Doligez, B., Pärt, T., Danchin, E., Clobert, J., & Gustafsson, L. (2004). Availability and use of public  
20 information and conspecific density for settlement decisions in the collared flycatcher. *Journal of*  
21 *Animal Ecology*, *73*, 75–87.
- 22 Emlen, S. T., & Oring, L. W. (1977). Ecology, sexual selection, and the evolution of mating systems.  
23 *Science*, *197*, 215–223.
- 24 Fiske, I., & Chandler, R. (2011). unmarked: An R package for fitting hierarchical models of wildlife  
25 occurrence and abundance. *Journal of Statistical Software*, *43*, 1–23.
- 26 Fretwell, S. D., & Lucas, H. L. (1969). On territorial behavior and other factors influencing habitat  
27 distribution in birds. *Acta Biotheoretica*, *19*, 16–36. doi:10.1007/bf01601953



- 1 Grobler, J. H. (1980). Host selection and species preference of the red-billed oxpecker *Buphagus*  
2 *erythrorhynchus* in the Kruger National Park. *Koedoe*, 23. doi:10.4102/koedoe.v23i1.637
- 3 Gueron, S., & Levin, S. A. (1995). The dynamics of group formation. *Mathematical Biosciences*,  
4 128, 243–264.
- 5 Horak, I., MacIvor, K., Petney, T., & De, V. V. (1987). Some avian and mammalian hosts of  
6 *Amblyomma hebraeum* and *Amblyomma marmoreum* (Acari: Ixodidae). *The Onderstepoort*  
7 *Journal of Veterinary Research*, 54, 397–403.
- 8 Horak, I., Potgieter, F., Walker, J. B., De Vos, V., & Boomker, J. (1983). The ixodid tick burdens of  
9 various large ruminant species in South African nature reserves. *Onderstepoort Journal of*  
10 *Veterinary Research*, 50, 221–228.
- 11 Hustler, K. (1987). Host preference of oxpeckers in the Hwange National Park, Zimbabwe. *African*  
12 *Journal of Ecology*, 25, 241–245. doi:10.1111/j.1365-2028.1987.tb01115.x
- 13 Hutchinson, J. M., & Waser, P. M. (2007). Use, misuse and extensions of “ideal gas” models of  
14 animal encounter. *Biological Reviews*, 82, 335–359.
- 15 Johnson, D. H. (1980). The comparison of usage and availability measurements for evaluating  
16 resource preference. *Ecology*, 61, 65–71.
- 17 Koenig, W. D. (1997). Host preferences and behaviour of oxpeckers: co-existence of similar species  
18 in a fragmented landscape. *Evolutionary Ecology*, 11, 91–104. doi:10.1023/a:1018439614008
- 19 Krebs, C. J. (1972). The experimental analysis of distribution and abundance. *New York: Harper*  
20 *and Row*.
- 21 Lack, D. L. (1966). *Population studies of birds*. Clarendon P.
- 22 Lotka, A. J. (1956). *Elements of mathematical biology*.
- 23 MacArthur, R. H. (1972). *Geographical ecology: patterns in the distribution of species*. Princeton  
24 University Press.
- 25 May, R. M. (1978). Host-parasitoid systems in patchy environments: a phenomenological model.  
26 *Journal of Animal Ecology*, 47, 833–843.
- 27 Morales, J. M., Moorcroft, P. R., Matthiopoulos, J., Frair, J. L., Kie, J. G., Powell, R. A., Merrill, E. H.,  
28 & Haydon, D. T. (2010). Building the bridge between animal movement and population dynamics.  
29 *Philosophical Transactions of the Royal Society B: Biological Sciences*, 365, 2289–2301.
- 30 Moreau, R. E. (1933). The food of the red-billed oxpecker, *Buphagus erythrorhynchus* (Stanley).  
31 *Bulletin of Entomological Research*, 24, 325. doi:10.1017/s000748530003162x
- 32 Mysterud, A., Hatlegjerde, I. L., & Sørensen, O. J. (2014). Attachment site selection of life stages of



- 1 *Ixodes ricinus* ticks on a main large host in Europe, the red deer (*Cervus elaphus*). *Parasites &*  
2 *Vectors*, 7. doi:10.1186/s13071-014-0510-x
- 3 Ndlovu, M., & Combrink, L. (2015). Feeding preferences of oxpeckers in Kruger National Park,  
4 South Africa. *Koedoe*, 57. doi:10.4102/koedoe.v57i1.1316
- 5 Nichols, J. D., Hines, J. E., Sauer, J. R., Fallon, F. W., Fallon, J. E., & Heglund, P. J. (2000). A  
6 double-observer approach for estimating detection probability and abundance from point counts.  
7 *The Auk*, 117, 393–408.
- 8 Nunn, C. L., Ezenwa, V. O., Arnold, C., & Koenig, W. D. (2011). Mutualism or parasitism? Using a  
9 phylogenetic approach to characterize the oxpecker-ungulate relationship. *Evolution*, 65,  
10 1297–1304. doi:10.1111/j.1558-5646.2010.01212.x
- 11 Ostfeld, R. S., & Keesing, F. (2000). Pulsed resources and community dynamics of consumers in  
12 terrestrial ecosystems. *Trends in Ecology & Evolution*, 15, 232–237.
- 13 Palmer, M. S., & Packer, C. (2018). Giraffe bed and breakfast: Camera traps reveal Tanzanian  
14 yellow-billed oxpeckers roosting on their large mammalian hosts. *African Journal of Ecology*.  
15 doi:10.1111/aje.12505
- 16 Pielou, E. (1969). An introduction to mathematical ecology. *An introduction to mathematical*  
17 *ecology*.
- 18 Plantan, T. B. (2009). *Feeding behaviour of wild and captive oxpeckers (Buphagus spp.): a case of*  
19 *conditional mutualism*. Ph.D. thesis, University of Miami.
- 20 Pyke, G. H. (1984). Optimal foraging theory: A critical review. *Annual Review of Ecology and*  
21 *Systematics*, 15, 523–575. doi:10.1146/annurev.es.15.110184.002515
- 22 R Core Team (2018). *R: A Language and Environment for Statistical Computing*. R Foundation for  
23 Statistical Computing, Vienna, Austria.
- 24 Samish, M., & Rehacek, J. (1999). Pathogens and predators of ticks and their potential in biological  
25 control. *Annual Review of Entomology*, 44, 159–182. doi:10.1146/annurev.ento.44.1.159
- 26 Seeber, P. A., Ndlovu, H. T., Duncan, P., & Ganswindt, A. (2012). Grazing behaviour of the giraffe in  
27 Hwange National Park, Zimbabwe. *African Journal of Ecology*, 50, 247.
- 28 Shaw, D., Grenfell, B., & Dobson, A. (1998). Patterns of macroparasite aggregation in wildlife host  
29 populations. *Parasitology*, 117, 597–610.
- 30 Shorrocks, B. (2016). *The giraffe: biology, ecology, evolution and behaviour*. John Wiley & Sons.
- 31 Sjöberg, M., Albrechtsen, B., & Hjältén, J. (2000). Truncated power laws: a tool for understanding  
32 aggregation patterns in animals? *Ecology letters*, 3, 90–94.

- 1 Stutterheim, C. (1976). *The biology of the red-billed oxpecker, Buphagus erythrorhynchus (Stanley*  
2 *1814) in the Kruger National Park*. Master's thesis, University of Pretoria, South African.
- 3 Stutterheim, I. M., Bezuidenhout, J. D., & Elliot, E. (1988). Comparative feeding behaviour and food  
4 preferences of oxpeckers (*Buphagus erythrorhynchus* and *B. africanus*) in captivity. *The*  
5 *Onderstepoort Journal of Veterinary Research*.
- 6 Talleklint, L., & Jaenson, T. G. (1997). Infestation of mammals by *Ixodes ricinus* ticks (Acari:  
7 Ixodidae) in south-central Sweden. *Experimental & applied acarology*, 21, 755–771.
- 8 Taylor, L., Woiwod, I., & Perry, J. (1979). The negative binomial as a dynamic ecological model for  
9 aggregation, and the density dependence of *k*. *The Journal of Animal Ecology*, (pp. 289–304).
- 10 Valeix, M., Fritz, H., Chamaillé-Jammes, S., Bourgarel, M., & Murindagomo, F. (2008). Fluctuations  
11 in abundance of large herbivore populations: insights into the influence of dry season rainfall and  
12 elephant numbers from long-term data. *Animal Conservation*, 11, 391–400.
- 13 van Someren, V. D. (1951). The red-billed oxpecker and its relation to stock in Kenya. *The East*  
14 *African Agricultural Journal*, 17, 1–11.
- 15 Venables, W. N., & Ripley, B. D. (2002). *Modern Applied Statistics with S*. New York: Springer,  
16 fourth edition. ISBN 0-387-95457-0.
- 17 Veríssimo, D., Cugnière, J.-C., Cugnière, S., Cugnière, J., Cugnière, G., & Cugnière, L. (2017).  
18 Record number of yellow-billed oxpeckers *Buphagus africanus* Linnaeus, 1766 (Aves:  
19 Passeriformes: Buphagidae) foraging on a single host. *Journal of Threatened Taxa*, 9, 9768.  
20 doi:10.11609/jott.3055.9.1.9768-9770
- 21 Weeks, P. (1999). Interactions between red-billed oxpeckers, *Buphagus erythrorhynchus*, and  
22 domestic cattle, *Bos taurus*, in Zimbabwe. *Animal Behaviour*, 58, 1253–1259.  
23 doi:10.1006/anbe.1999.1265
- 24 Weeks, P. (2000). Red-billed oxpeckers: vampires or tickbirds? *Behavioral Ecology*, 11, 154–160.  
25 doi:10.1093/beheco/11.2.154
- 26 Welsh, E. C., Keesing, F., & Allan, B. F. (2019). Oxpecker (*Buphagus erythrorhynchus*, *Buphagus*  
27 *africanus*) and tick abundances in acaricide-treated livestock areas. *African Journal of Ecology*,  
28 57, 155–159.
- 29 Wittenberger, J. F. (1981). *Animal social behavior*. Duxbury Press.
- 30 Zahavi, A. (1975). Mate selection – a selection for a handicap. *Journal of theoretical Biology*, 53,  
31 205–214.

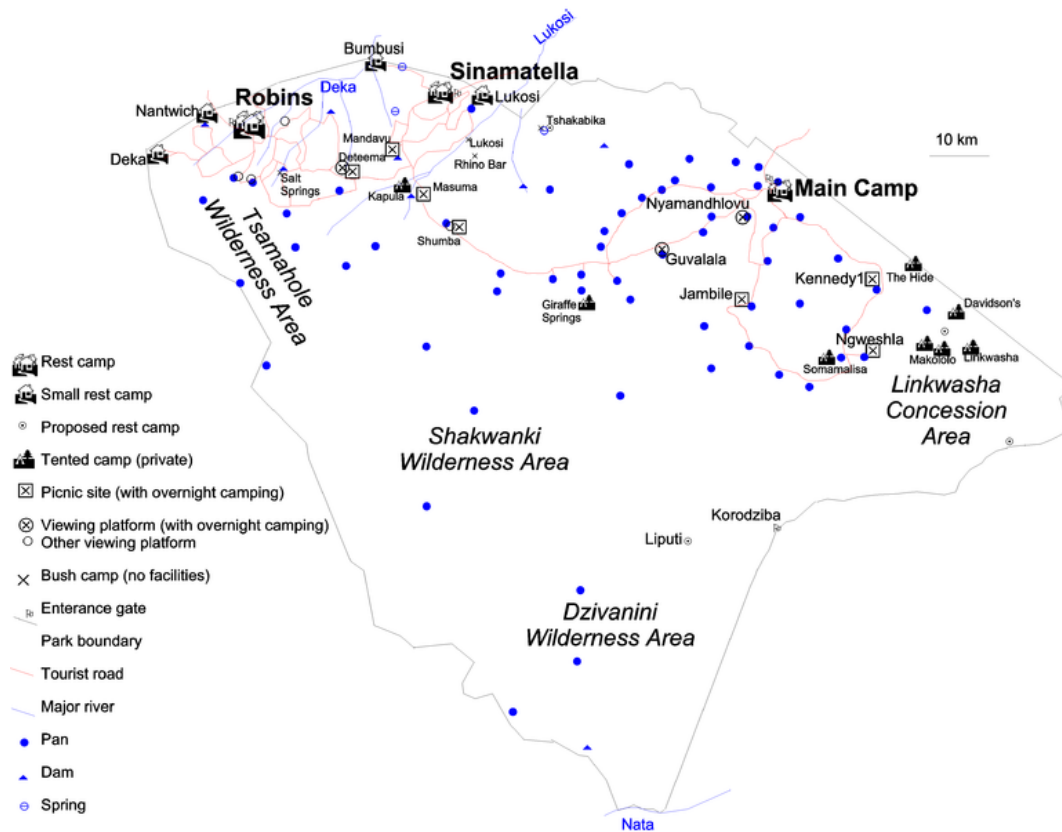

**Fig. 1** Hwange National Park map, Zimbabwe. The data collected (2013-2015) from oxpeckers (*Buphagus sp.*) and giraffes (*Giraffa camelopardalis*) derived from a study located in the Main Camp area, covering the north east of the park from Ngweshla to Giraffe Springs passing through Jambile. ('Hwange National Park' 2019, in Wikipedia: The Free Encyclopedia, Wikimedia Foundation Inc., viewed 11 May 2019, <[https://en.wikipedia.org/wiki/Hwange\\_National\\_Park](https://en.wikipedia.org/wiki/Hwange_National_Park)>)

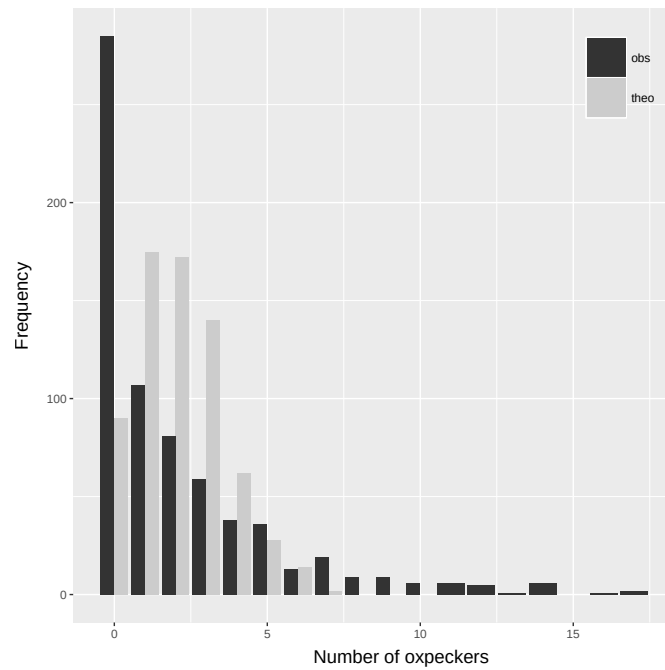

**Fig. 2** Distribution of oxpeckers (*Buphagus sp.*) on individual giraffes (*Giraffa camelopardalis*) at Hwange National Park, Zimbabwe. In black is the observed distribution and in grey the expected distribution according to a Poisson distribution law taking the observed mean as parameter ( $\lambda = 2.16$ ). Note the marked over-representation of giraffes carrying no bird and the long distribution tail of giraffes with numerous birds on their body in the observed data.

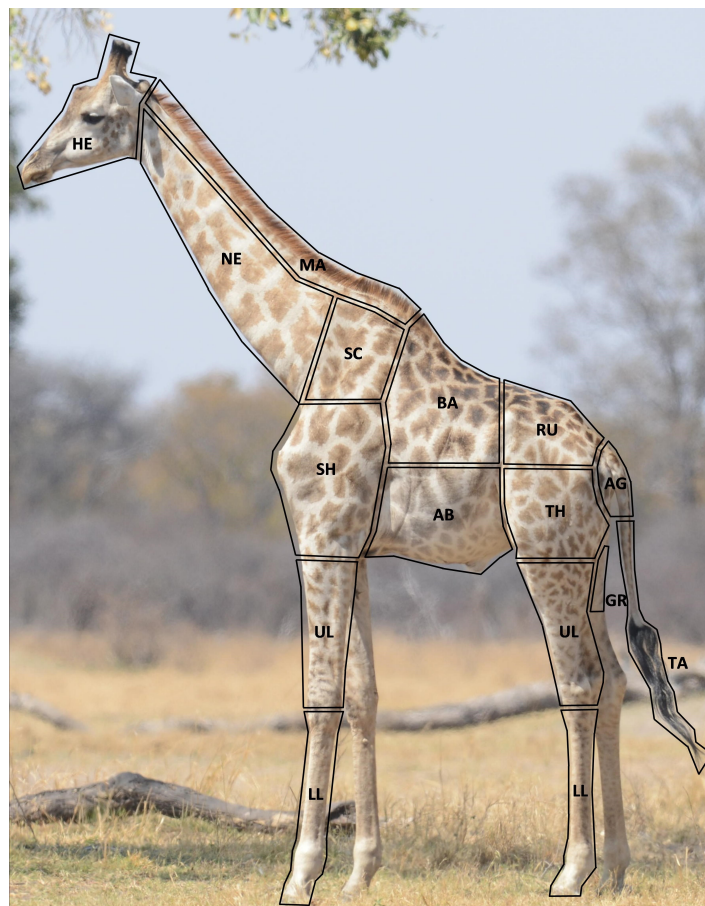

(A)

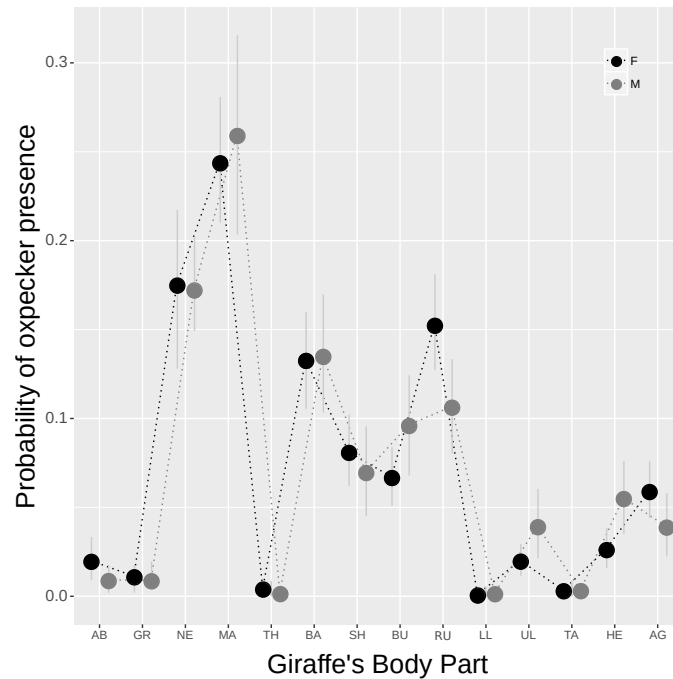

(B)

**Fig. 3** (A) Defined zonation and (B) proportion of oxpeckers (*Buphagus sp.*) counted on the 14 different body parts of giraffes (*Giraffa camelopardalis*) observed at Hwange National Park, Zimbabwe. The 14 different body parts we defined were: AB: abdomen, GR: groin, NE: neck, MA: mane, TH: thigh, BA: back, SH: shoulder, RU: rump, SC: scapula, LL: lower leg, UL: upper leg, TA: tail, HE: head, AG: ano-genital. Although the general patterns were similar the use of giraffe body parts by oxpeckers differed significantly ( $n = 683$  giraffes).

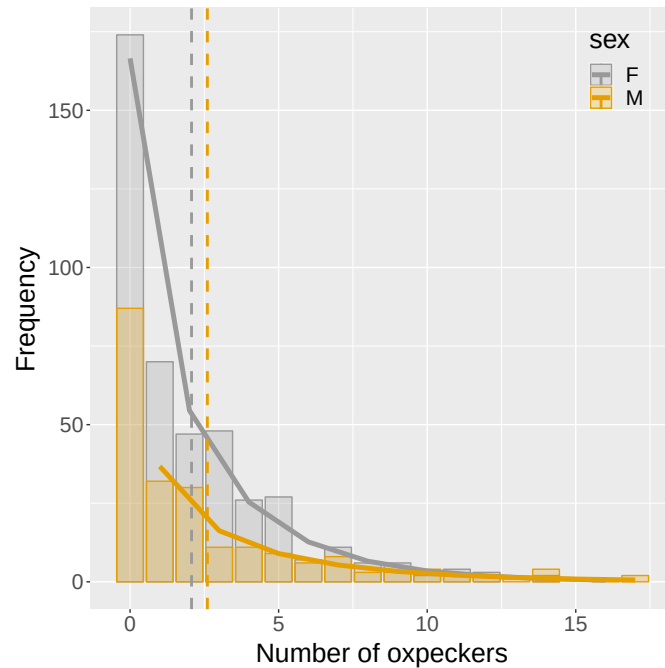

**Fig. 4** Distribution of oxpeckers (*Buphagus sp.*) on male and female giraffes (*Giraffa camelopardalis*) at Hwange National Park, Zimbabwe. Curves are the predicted frequencies as given by a negative binomial distribution model which parameters have been estimated separately for the two sexes. Vertical dashed lines represent the mean number of oxpeckers carried by individual giraffes. Note that males with no oxpecker are less frequent than females, and that the largest aggregations of oxpeckers have been found on male giraffes.
